# Supplementary material for: Ancestral sequence reconstruction produces thermally stable enzymes with mesophilic enzyme-like catalytic properties
Source: PubMed Central journal article supplement (PMC7511310; doi:10.1038/s41598-020-72418-4), 2020-09-23
Supplement: 41598_2020_72418_MOESM3_ESM.pdf [file 41598_2020_72418_MOESM3_ESM.pdf]

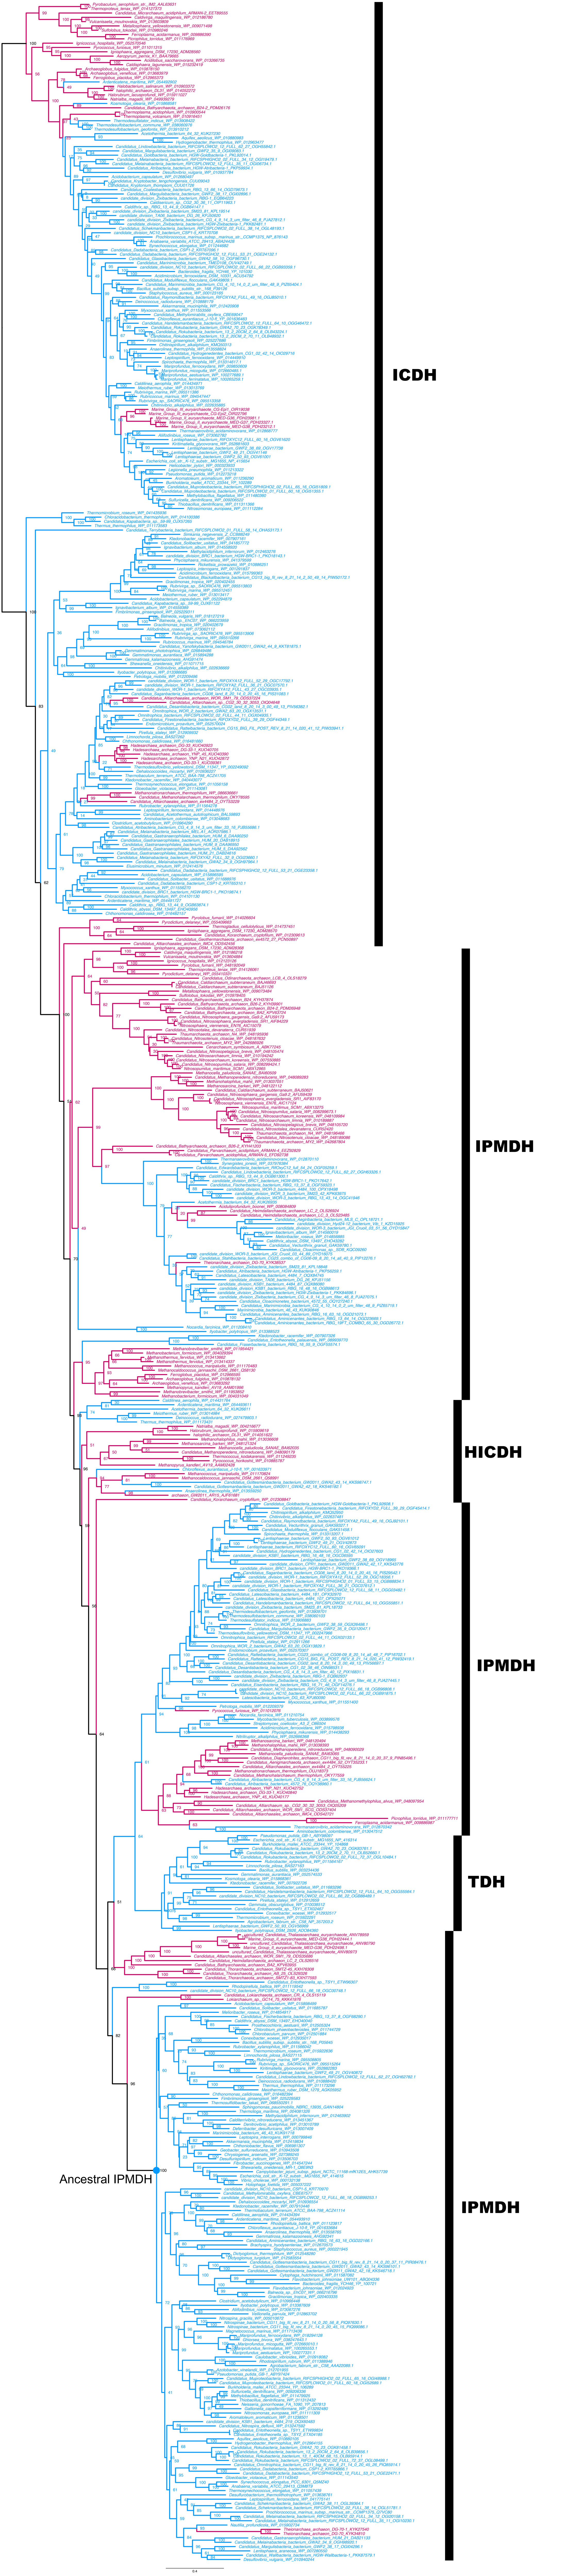

**ICDH**

**IPMDH**

**HICDH**

**TDH**

**AncestorIPMDH**

**IPMDH**
